# Supplementary material for: Maternal pregnancy-related infections and autism spectrum disorder—the genetic perspective
Source: PubMed Central journal article supplement (PMC9381559; doi:10.1038/s41398-022-02068-9), 2022-08-16
Supplement: 41398_2022_2068_MOESM2_ESM.pdf [file 41398_2022_2068_MOESM2_ESM.pdf]

| <b>Supplementary Table S1: ICD-8 and ICD-10 codes for site and type of infection</b> |                                                                                                                                                                                                                                                                                                                                                                                                                                                                                                                                                                                                                                                                         |                                                                                                                                                                                                                                                                                                                                                                                                                                                                                                                                                                                                                                          |
|--------------------------------------------------------------------------------------|-------------------------------------------------------------------------------------------------------------------------------------------------------------------------------------------------------------------------------------------------------------------------------------------------------------------------------------------------------------------------------------------------------------------------------------------------------------------------------------------------------------------------------------------------------------------------------------------------------------------------------------------------------------------------|------------------------------------------------------------------------------------------------------------------------------------------------------------------------------------------------------------------------------------------------------------------------------------------------------------------------------------------------------------------------------------------------------------------------------------------------------------------------------------------------------------------------------------------------------------------------------------------------------------------------------------------|
| Infection category                                                                   | ICD-8 Codes                                                                                                                                                                                                                                                                                                                                                                                                                                                                                                                                                                                                                                                             | ICD-10 Codes                                                                                                                                                                                                                                                                                                                                                                                                                                                                                                                                                                                                                             |
| <b>Site of infection</b>                                                             |                                                                                                                                                                                                                                                                                                                                                                                                                                                                                                                                                                                                                                                                         |                                                                                                                                                                                                                                                                                                                                                                                                                                                                                                                                                                                                                                          |
| Sepsis infections                                                                    | 038                                                                                                                                                                                                                                                                                                                                                                                                                                                                                                                                                                                                                                                                     | A40-A41                                                                                                                                                                                                                                                                                                                                                                                                                                                                                                                                                                                                                                  |
| Hepatitis infections                                                                 | 070                                                                                                                                                                                                                                                                                                                                                                                                                                                                                                                                                                                                                                                                     | B15-B19, K770A, K770B                                                                                                                                                                                                                                                                                                                                                                                                                                                                                                                                                                                                                    |
| Gastrointestinal infections                                                          | 000-009, 540                                                                                                                                                                                                                                                                                                                                                                                                                                                                                                                                                                                                                                                            | A00-A09, K35                                                                                                                                                                                                                                                                                                                                                                                                                                                                                                                                                                                                                             |
| Skin infection                                                                       | 035, 050-057, 110-111, 680-686                                                                                                                                                                                                                                                                                                                                                                                                                                                                                                                                                                                                                                          | A46, B00-B09, L00-L08                                                                                                                                                                                                                                                                                                                                                                                                                                                                                                                                                                                                                    |
| Respiratory infections                                                               | 460-486                                                                                                                                                                                                                                                                                                                                                                                                                                                                                                                                                                                                                                                                 | J00-J18, J22, J36                                                                                                                                                                                                                                                                                                                                                                                                                                                                                                                                                                                                                        |
| Urological infections                                                                | 580, 590, 595                                                                                                                                                                                                                                                                                                                                                                                                                                                                                                                                                                                                                                                           | N00, N05, N129, N300, N370, N390                                                                                                                                                                                                                                                                                                                                                                                                                                                                                                                                                                                                         |
| Genital infection                                                                    | 604, 612, 620, 622                                                                                                                                                                                                                                                                                                                                                                                                                                                                                                                                                                                                                                                      | N45, N512, N70, N700, N709, N760, N762, N764, N770, N771, N518B                                                                                                                                                                                                                                                                                                                                                                                                                                                                                                                                                                          |
| Pregnancy-related infections                                                         | 630, 635, 670                                                                                                                                                                                                                                                                                                                                                                                                                                                                                                                                                                                                                                                           | O23, O264, O85-O86, O98                                                                                                                                                                                                                                                                                                                                                                                                                                                                                                                                                                                                                  |
| Otitis media infections                                                              | 381-382                                                                                                                                                                                                                                                                                                                                                                                                                                                                                                                                                                                                                                                                 | H65-H67                                                                                                                                                                                                                                                                                                                                                                                                                                                                                                                                                                                                                                  |
| Central nervous system infections                                                    | 013, 02701, 03609, 040-043, 04509, 04519, 04599, 046, 05201, 05302, 05403, 05501, 05601, 06209, 06219, 06229, 06239, 06249, 06299, 06309, 06319, 06329, 06399, 06499, 06599, 07199, 07202, 07501, 07929, 09049, 09490, 0949, 320, 322-324, 474                                                                                                                                                                                                                                                                                                                                                                                                                          | A066, A022C, A17, A229C, A321, A390, A504, A514B, A521, A521A, A521B, A548A, A548D, A80-A89, B003, B004, B010, B011, B020, B021, B050, B051, B060, B261, B262, B375, B451, B582, B602, E236A, G00-G07                                                                                                                                                                                                                                                                                                                                                                                                                                    |
| HIV/AIDS                                                                             | 07983                                                                                                                                                                                                                                                                                                                                                                                                                                                                                                                                                                                                                                                                   | B20-B24                                                                                                                                                                                                                                                                                                                                                                                                                                                                                                                                                                                                                                  |
| <b>Type of infection</b>                                                             |                                                                                                                                                                                                                                                                                                                                                                                                                                                                                                                                                                                                                                                                         |                                                                                                                                                                                                                                                                                                                                                                                                                                                                                                                                                                                                                                          |
| Bacterial infections                                                                 | 000, 00009, 00019, 00099, 00199, 002-005, 008, 01099, 011-018, 020-023, 025-027, 030-039, 07399, 07699, 07984, 08899, 08900, 08099, 081-083, 09009, 09049, 09059, 091-098, 100-104, 32009, 32019, 32080, 322, 380-382, 390-392, 420-421, 461-463, 46403, 481-483, 50199, 50800, 50801, 50802, 50803, 510, 513, 52259, 52649, 52722, 52838, 52839, 52903, 54001, 566-567, 57703, 590, 59500, 59501, 59700, 59703, 59900, 59906, 601, 604, 60739, 61100, 61101, 612, 614, 62090, 62099, 622, 62949, 630, 63109, 63110, 63111, 63119, 63129, 63139, 635, 670, 67801, 680, 68108, 68109, 682, 68399, 68408, 68409, 68501, 68600, 68608, 710, 7200, 7201, 7202, 72031, 73299 | A022C, A03-A05, A15-A28, A30-A58, A65-A79, B95-B96, B088D, D733, E060A, E236A, E321, I301A, I301B, I301C, I301D, I320, I410, I430, I520, J01, J020, J030, J13-J15, J160, J170, J851, J86, J860, J869, K040A, K046A, K052A, K112A, K130A, K140A, K209A, K113, K122, K351, K61, K650N, K67, K630, K930, L00-L04, L08, M00, M010-M013, M015B, M014, M463, M490-M492, M680, M725A, N10, N12, N136, N151, N200I, N201I, N300, N309, N340, N341, N390, N410, N412, N431, N450, N459, N510A, N510C, N511, N70, N71, N72, N73, N74, N740, N741, N742, N743, N744, N764, N980, O23, O753, O85-O86, O980, O981, O982, T793, T802, T814, T874, T880 |
| Viral infections                                                                     | 00880, 00889, 00890, 040-046, 050-057, 060-065, 067-068, 070-072, 074-075, 46099, 464, 46599, 47099, 471-474, 48099                                                                                                                                                                                                                                                                                                                                                                                                                                                                                                                                                     | A08, A60, A630, A80-A89, A90-A99, B00, B060, B01-B09, B15-B26, B260, B261, B262, B263, B268, B269, B27, B270, B271, B278, B279, B33, B330, B331, B332, B333, B338, B34, B340, B341, B342, B343, B344, B348, B349, B97, G020, G051, H621A, H621B, H671A, H671B, I301E, I400B, I411A, I411B, J00, J04-J06, J10- J12, J050, J171, J203, J204, J205, J206, J207, J210, K770A, K770B, K871A, K871B, M014, M015, M015A, N518B, N770D, N771B, N771G, N771L                                                                                                                                                                                      |
| Other infections                                                                     | 006-007, 00899, 00999, 084, 087, 089, 09991, 09992, 09993, 09999, 110-117, 120-131, 13603, 13600, 572, 99859                                                                                                                                                                                                                                                                                                                                                                                                                                                                                                                                                            | A06-A07, A085, A09, A59, A63-A64, B35-B60, B64-B83, B87-B89, B99, G02, G040, G049, G052, G079D, H622, I301, I400, I411, I412, I521C, I33, J18, J02-J03, J172-J173, J178, J22, J998B, J998C, K770C, K770D, K770E, K35, K750, L303, M016, M631C, M631D, M631E, M631F, M632A, M651, M711, N370A, N160D, O983, O986-O989, T89                                                                                                                                                                                                                                                                                                                |

Notes for this table: we have amended this table to reflect the exact codes that were extracted from the register, as we discovered that the previous versions (1, 2) had some minor errors/omissions. This involved 4 codes that were in the original table but not included in the study (in the viral or bacterial infection categories, namely I398, N11, 078 and 07983, the latter of which was mistakenly written as 079.82), and 4 codes that were included but were not noted in original the table (also in the viral or bacterial infection categories, namely N309, N340, I301E and J050). Regarding the former group, however, the frequency of these codes among individuals born between 1981 and 2005 in the entire Danish population from hospital registry data until 2017 (roughly the same year of birth range and an even later registry access date as in iPSYCH) are 0.000009, 0.00039, 0.000019 and 0.0000098, respectively (the last frequency corrects a typographical error as well (3)). Therefore, we do not expect to have many individuals in iPSYCH who had only these codes and none of the other ones, who were consequently erroneously treated as controls (since the iPSYCH sample was nested in a smaller sample than the one used above and underwent case or random sample selection, as well as quality control, which greatly reduced the final sample). Also, not all codes are, in fact, infection diagnoses per se (I398, N11).

Additionally, we provide a higher resolution (more specific) code for some diagnoses; in most cases this does not reflect any change e.g. where the previous version listed ICD-8 code "062" and this version lists "06209, 06219, 06229, 06239, 06249, 06299", and only these six codes appear in the Danish ICD-8 under 062. Cases in which ICD-8 had more codes than listed here include 089 and 599, but overall these were very rare, with frequencies of 0.000002 and 0.00004, respectively, for the higher resolution codes that were not included in the study. When a lower resolution code is listed in the table, it can be understood as including all diagnoses under its ICD entry. For example, ICD-8 060 includes 06009, 06019 etc.

1. Nudel R, Appadurai V, Schork AJ, Buil A, Bybjerg-Grauholm J, Borglum AD, et al. A large population-based investigation into the genetics of susceptibility to gastrointestinal infections and the link between gastrointestinal infections and mental illness. *Human genetics*. 2020;139(5):593-604. Epub 2020/03/11.
2. Nudel R, Wang Y, Appadurai V, Schork AJ, Buil A, Agerbo E, et al. A large-scale genomic investigation of susceptibility to infection and its association with mental disorders in the Danish population. *Translational psychiatry*. 2019;9(1):283. Epub 2019/11/13.
3. Nudel R, Allesoe RL, Thompson WK, Werge T, Rasmussen S, Benros ME. A large-scale investigation into the role of classical HLA loci in multiple types of severe infections, with a focus on overlaps with autoimmune and mental disorders. *Journal of translational medicine*. 2021;19(1):230. Epub 2021/06/02.
