# Supplementary material for: Maternal pregnancy-related infections and autism spectrum disorder—the genetic perspective
Source: PubMed Central journal article supplement (PMC9381559; doi:10.1038/s41398-022-02068-9), 2022-08-16
Supplement: 41398_2022_2068_MOESM3_ESM.pdf [file 41398_2022_2068_MOESM3_ESM.pdf]

Supplementary Table S2: Suggestive associations from the case-case GWAS between ASD with a history of maternal pregnancy-related infections and ASD with no history of maternal infections.

| Marker                      | CHR | BP        | A1_effect | A2_other | OR     | P        |
|-----------------------------|-----|-----------|-----------|----------|--------|----------|
| rs115840688:24965155:T:A    | 1   | 24965155  | A         | T        | 2.159  | 6.39E-08 |
| rs116870656:87424241:T:C    | 9   | 87424241  | C         | T        | 2.301  | 8.31E-07 |
| rs28499090:36981867:G:A     | 15  | 36981867  | A         | G        | 0.5161 | 2.04E-06 |
| rs77055220:59309296:T:C     | 18  | 59309296  | C         | T        | 0.5716 | 2.11E-06 |
| rs113593840:15128181:AG:A   | 19  | 15128181  | A         | AG       | 1.545  | 2.16E-06 |
| rs73965710:59279082:C:T     | 18  | 59279082  | T         | C        | 0.5759 | 2.45E-06 |
| rs72815824:61443102:G:A     | 10  | 61443102  | A         | G        | 1.455  | 2.59E-06 |
| rs78758931:61442637:TA:T    | 10  | 61442637  | T         | TA       | 1.454  | 2.66E-06 |
| rs116019520:96532142:G:T    | 1   | 96532142  | T         | G        | 2.434  | 2.91E-06 |
| rs77936581:59313398:A:T     | 18  | 59313398  | T         | A        | 0.5781 | 2.96E-06 |
| rs73965711:59279991:C:T     | 18  | 59279991  | T         | C        | 0.5794 | 3.18E-06 |
| rs35983811:15133289:C:T     | 19  | 15133289  | T         | C        | 1.457  | 3.45E-06 |
| rs143215045:13805880:CTG:C  | 19  | 13805880  | C         | CTG      | 1.678  | 3.54E-06 |
| rs34158429:13803626:T:C     | 19  | 13803626  | C         | T        | 1.677  | 3.57E-06 |
| rs34803931:83146358:T:G     | 16  | 83146358  | T         | G        | 0.7543 | 3.71E-06 |
| rs72812337:61426082:G:A     | 10  | 61426082  | A         | G        | 1.443  | 3.86E-06 |
| rs72812320:61401338:A:T     | 10  | 61401338  | T         | A        | 1.443  | 3.90E-06 |
| rs76637859:59314388:G:C     | 18  | 59314388  | C         | G        | 0.5822 | 4.10E-06 |
| rs9960598:59314289:T:A      | 18  | 59314289  | A         | T        | 0.5822 | 4.10E-06 |
| rs73965706:59276522:T:G     | 18  | 59276522  | G         | T        | 0.5849 | 4.15E-06 |
| rs71276886:15130781:A:AT    | 19  | 15130781  | AT        | A        | 1.511  | 4.22E-06 |
| rs11856353:36971349:T:C     | 15  | 36971349  | C         | T        | 0.5401 | 4.33E-06 |
| rs116565907:59315708:G:A    | 18  | 59315708  | A         | G        | 0.5831 | 4.38E-06 |
| rs140407434:59316153:T:TC   | 18  | 59316153  | TC        | T        | 0.5831 | 4.38E-06 |
| rs12572003:61444695:G:A     | 10  | 61444695  | A         | G        | 1.48   | 4.59E-06 |
| rs72812351:61440582:T:G     | 10  | 61440582  | G         | T        | 1.436  | 5.10E-06 |
| rs7099535:52441797:T:C      | 10  | 52441797  | C         | T        | 1.588  | 5.24E-06 |
| rs71334754:15128105:G:A     | 19  | 15128105  | A         | G        | 1.521  | 5.61E-06 |
| rs7196746:83144899:T:A      | 16  | 83144899  | T         | A        | 0.759  | 5.70E-06 |
| rs7234372:59314603:T:C      | 18  | 59314603  | C         | T        | 0.5995 | 5.70E-06 |
| rs60693457:59261822:G:A     | 18  | 59261822  | A         | G        | 0.5901 | 5.97E-06 |
| rs12455735:59316220:C:T     | 18  | 59316220  | T         | C        | 0.6003 | 6.03E-06 |
| rs7191965:83144957:A:G      | 16  | 83144957  | A         | G        | 0.7596 | 6.06E-06 |
| rs72812334:61425315:A:G     | 10  | 61425315  | G         | A        | 1.432  | 6.17E-06 |
| rs117103609:61419989:T:C    | 10  | 61419989  | C         | T        | 1.431  | 6.45E-06 |
| rs143636116:61421594:A:C    | 10  | 61421594  | C         | A        | 1.431  | 6.52E-06 |
| rs67656598:61388832:A:G     | 10  | 61388832  | G         | A        | 1.432  | 6.59E-06 |
| rs17446017:103144758:G:T    | 12  | 103144758 | T         | G        | 1.748  | 6.93E-06 |
| rs111900668:59367726:T:C    | 18  | 59367726  | C         | T        | 0.6126 | 7.00E-06 |
| rs12328494:30268081:C:T     | 2   | 30268081  | T         | C        | 1.389  | 7.08E-06 |
| rs138076534:61424745:CAT:C  | 10  | 61424745  | C         | CAT      | 1.429  | 7.13E-06 |
| rs59111564:31787027:G:A     | 4   | 31787027  | A         | G        | 1.779  | 7.50E-06 |
| rs16913940:61431755:A:C     | 10  | 61431755  | C         | A        | 1.427  | 7.69E-06 |
| rs17068735:59314899:C:T     | 18  | 59314899  | T         | C        | 0.6052 | 7.70E-06 |
| rs72812347:61438785:C:T     | 10  | 61438785  | T         | C        | 1.426  | 7.77E-06 |
| rs61849886:23375606:C:T     | 10  | 23375606  | T         | C        | 0.692  | 8.13E-06 |
| rs62393909:178220941:T:C    | 5   | 178220941 | C         | T        | 2.195  | 8.49E-06 |
| rs16913885                  | 10  | 61388368  | A         | G        | 1.424  | 8.51E-06 |
| rs4075465:83148925:G:A      | 16  | 83148925  | G         | A        | 0.7609 | 8.59E-06 |
| rs1975958                   | 10  | 23387293  | A         | G        | 0.7092 | 8.65E-06 |
| rs1171655:61446633:C:T      | 10  | 61446633  | C         | T        | 1.467  | 9.03E-06 |
| rs35446811:59355925:CA:C    | 18  | 59355925  | C         | CA       | 0.6164 | 9.07E-06 |
| rs55755822:59358022:A:ATTAC | 18  | 59358022  | ATTAC     | A        | 0.6164 | 9.11E-06 |
| rs72705319:92309802:C:T     | 14  | 92309802  | T         | C        | 2.188  | 9.12E-06 |
| rs1975959:23387323:A:G      | 10  | 23387323  | G         | A        | 0.7098 | 9.15E-06 |
| rs138262784:103141583:G:T   | 12  | 103141583 | T         | G        | 1.734  | 9.22E-06 |
| rs56106378:30265763:T:A     | 2   | 30265763  | A         | T        | 1.394  | 9.45E-06 |
| rs61849888:23376982:A:C     | 10  | 23376982  | C         | A        | 0.7087 | 9.46E-06 |
| rs6417253:15135524:C:G      | 19  | 15135524  | C         | G        | 1.375  | 9.46E-06 |
| rs6512002:15135471:T:C      | 19  | 15135471  | T         | C        | 1.375  | 9.46E-06 |
| rs3793757:23386155:T:G      | 10  | 23386155  | G         | T        | 0.7105 | 9.65E-06 |
| rs3838758:23386148:C:CAG    | 10  | 23386148  | CAG       | C        | 0.7105 | 9.65E-06 |
| rs55656603:23384238:A:G     | 10  | 23384238  | G         | A        | 0.7109 | 1.00E-05 |
| rs56201167:23384152:G:A     | 10  | 23384152  | A         | G        | 0.7109 | 1.00E-05 |
